# Supplementary material for: Preventive behaviors by the level of perceived infection sensitivity during the Korea outbreak of Middle East Respiratory Syndrome in 2015
Source: PubMed Central journal article supplement (PMC5309729; doi:10.4178/epih.e2016051), 2016-11-16
Supplement: epih-38-e2016051-app1.pdf [file epih-38-e2016051-app1.pdf]

**Appendix 1.** Survey questions and interpretations

| Category                            |                    | Quarantions/choices and scoring                                                                                                                                                                                                                                                                                                                                                                                                                                                                                           |
|-------------------------------------|--------------------|---------------------------------------------------------------------------------------------------------------------------------------------------------------------------------------------------------------------------------------------------------------------------------------------------------------------------------------------------------------------------------------------------------------------------------------------------------------------------------------------------------------------------|
| Infection sensitivity               | Question items     | How much did you worry about the items below during the MERS outbreak period?<br>Worried about being infected by MERS<br>Worried about death due to worsening of the disease if infected by MERS<br>Worried about MERS infection of children, the elderly or patients with chronic disease in the family<br>Worried that the nationwide epidemic of MERS will cause socioeconomic chaos                                                                                                                                   |
|                                     | Choices and scores | Strongly agree: 5 points<br>Agree: 4 points<br>Average: 3 points<br>Disagree: 2 points<br>Strongly disagree: 1 point                                                                                                                                                                                                                                                                                                                                                                                                      |
| Reliability of preventive behaviors | Question items     | How much do you think the following preventive guidelines can reduce the risk of MERS infection?<br>Frequent hand washing with soap or sanitizer<br>Not touching the eyes, the nose or the mouth with unclean hands<br>Covering with tissue or a handkerchief while sneezing or coughing<br>Avoiding contact with others who have a fever or respiratory symptoms<br>Wearing face masks when going outside<br>Avoiding places where there are many people<br>Refraining from visiting patients and medical institutions   |
|                                     | Choices and scores | Strongly agree: 5 points<br>Agree: 4 points<br>Average: 3 points<br>Disagree: 2 points<br>Strongly disagree: 1 point                                                                                                                                                                                                                                                                                                                                                                                                      |
| Practice of preventive behaviors    | Question items     | How well did you practice the following guidelines for prevention during the MERS outbreak period?<br>Frequent hand washing with soap or sanitizer<br>Not touching the eyes, the nose or the mouth with unclean hands<br>Covering with tissue or a handkerchief while sneezing or coughing<br>Avoiding contact with others who have a fever or respiratory symptoms<br>Wearing face masks when going outside<br>Avoiding places where there are many people<br>Refraining from visiting patients and medical institutions |
|                                     | Choices and scores | Extremely well-5 points<br>Good-4 points<br>Average-3 points<br>Bad-2 points<br>Not at all-1 point                                                                                                                                                                                                                                                                                                                                                                                                                        |
| Practice of hand washing            | Question items     | Followings are questions about hand washing during the MERS outbreak period.<br>How often did you wash your hands before eating?<br>How often did you wash your hands after using the restroom?<br>How often did you wash your hands after returning from the outdoors?<br>How often did you wash your hands with soap or hand sanitizer?                                                                                                                                                                                 |
|                                     | Choices and scores | Always: 4 points<br>Frequently: 3 points<br>Sometimes: 2 points<br>Hardly: 1 point                                                                                                                                                                                                                                                                                                                                                                                                                                        |
| Policy credibility                  | Question items     | Do you think the following notifications and policies for the MERS outbreak were appropriate?<br>How did you find guidelines for MERS prevention and notification by the government?<br>How did you find the delivery of information about the MERS outbreak through the mass media?<br>How did you find the implementation of countermeasures against MERS infection by domestic medical institutions?<br>How did you find the countermeasure to prevent MERS from spreading (quarantine, etc.)?                         |
|                                     | Choices and scores | Highly appropriate: 5 points<br>Appropriate: 4 points<br>Average: 3 points<br>Inappropriate: 2 points<br>Extremely inappropriate: 1 point                                                                                                                                                                                                                                                                                                                                                                                 |

MERS, Middle East Respiratory Syndrome.
